# Supplementary material for: Silkworm Hemolymph and Cocoon Metabolomics Reveals Valine Improves Feed Efficiency of Silkworm Artificial Diet
Source: MDPI journal article supplement (doi:10.3390/insects15040291), 2024-04-19
Supplement: s1 [file s1]

## Supplementary materials

# Silkworm Hemolymph and Cocoon Metabolomics Reveals Valine Improves Feed Efficiency of Silkworm Artificial Diet

Jinxin Wu<sup>1†</sup>, Lingyi Li<sup>2†</sup>, Daoyuan Qin<sup>1</sup>, Chen Han<sup>1</sup>, Yuanlin Liu<sup>1</sup>, Guanwang Shen<sup>1\*</sup>, Ping Zhao<sup>1\*</sup>

<sup>1</sup> Integrative Science Center of Germplasm Creation in Western China (Chongqing) Science City, Biological Science Research Center, Southwest University, Chongqing 400715, China.

<sup>2</sup> Westa College, Southwest University, Chongqing 400715, China.

\* Correspondence: gwshen@swu.edu.cn; zhaop@swu.edu.cn; Tel./Fax: Zhao, P. +86-023-6825-0885

† These authors contributed equally to this work.

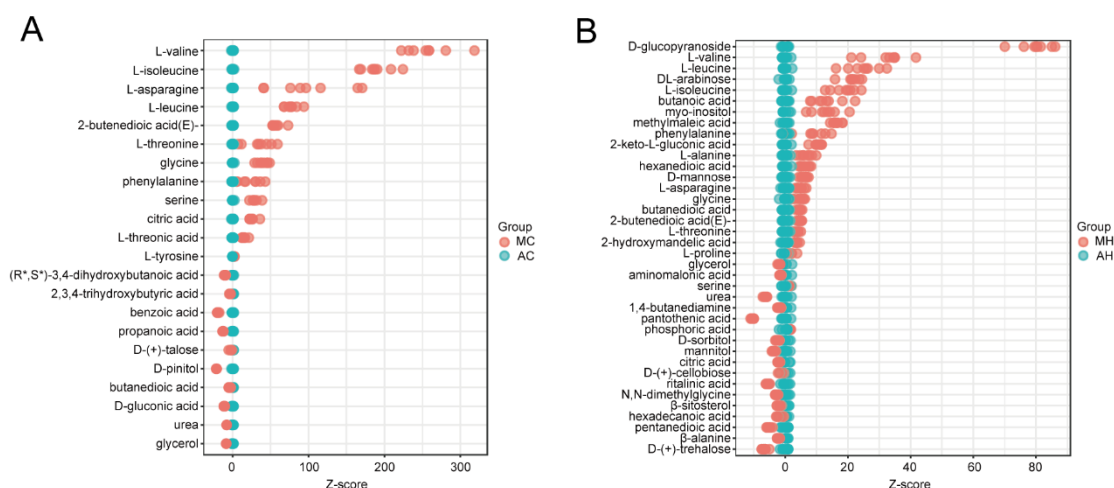

**Figure. S1.** z-score plot of the analysis of differential metabolites in the cocoon and hemolymph between silkworms reared on mulberry leaves and the artificial diet. (a) cocoon and (b) hemolymph. AC: cocoon of artificial diet rearing group; MC: cocoon of mulberry leaf rearing group. AH: hemolymph of artificial diet rearing group; MH: hemolymph of mulberry leaf rearing group. n=8 replicates.

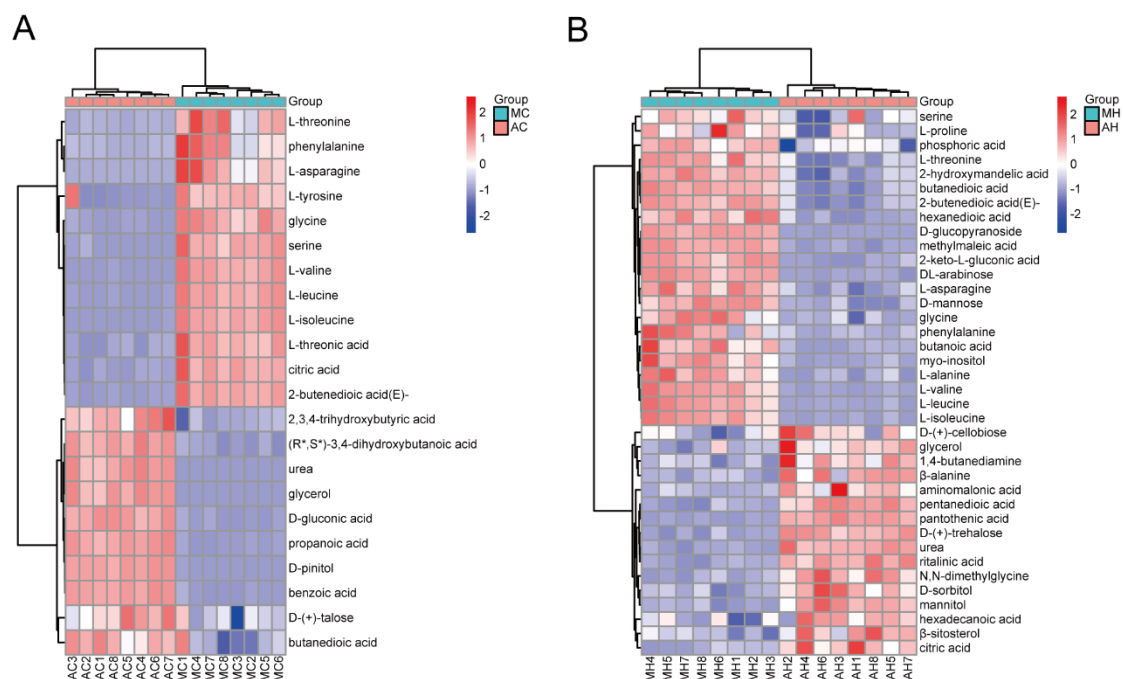

**Figure S2.** Relative Hierarchical cluster analysis and the heatmap of the differential abundance metabolites in the mulberry leaves group and the artificial-diet group. AC: cocoon of artificial diet rearing group; MC: cocoon of mulberry leaf rearing group. AH: hemolymph of artificial diet rearing group; MH: hemolymph of mulberry leaf rearing group. n=8 replicates.
